# Supplementary material for: C/EBPβ isoform-specific regulation of migration and invasion in triple-negative breast cancer cells
Source: PubMed Central journal article supplement (PMC8766495; doi:10.1038/s41523-021-00372-z), 2022-01-18
Supplement: 41523_2021_372_MOESM1_ESM.pdf [file 41523_2021_372_MOESM1_ESM.pdf]

## Supplementary Figures 1-4 and Table 1

### **C/EBP $\beta$ isoform-specific regulation of migration and invasion in triple-negative breast cancer cells**

Britt A. Sterken<sup>1</sup>, Tobias Ackermann<sup>1§</sup>, Christine Müller<sup>1§</sup>, Hidde R. Zuidhof<sup>1</sup>, Gertrud Kortman<sup>1</sup>, Alejandra Hernandez-Segura<sup>1</sup>, Mathilde Broekhuis<sup>2</sup>, Diana Spierings<sup>3</sup>, Victor Guryev<sup>1</sup>, Cornelis F. Calkhoven<sup>1\*</sup>

<sup>1</sup>European Research Institute for the Biology of Ageing (ERIBA), <sup>2</sup>iPSC CRISPR facility, <sup>3</sup>Research Sequencing facility, University Medical Center Groningen, University of Groningen, 9700 AD Groningen, The Netherlands.

§These authors contributed equally

\*corresponding author: c.f.calkhoven@umcg.nl

Supplementary Figure 1

a

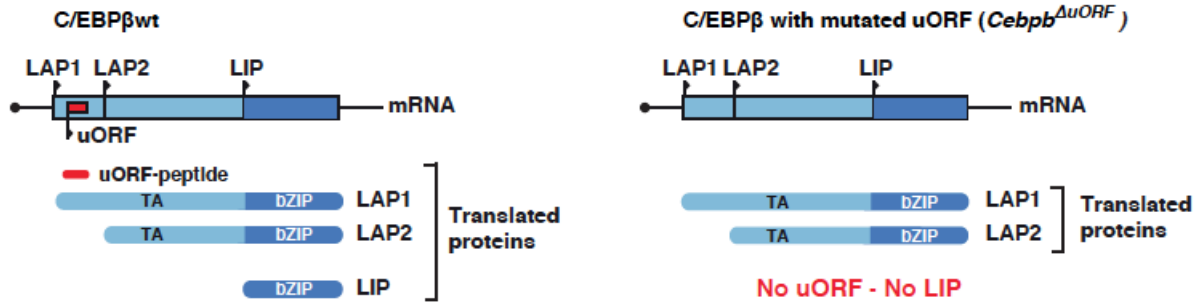

b

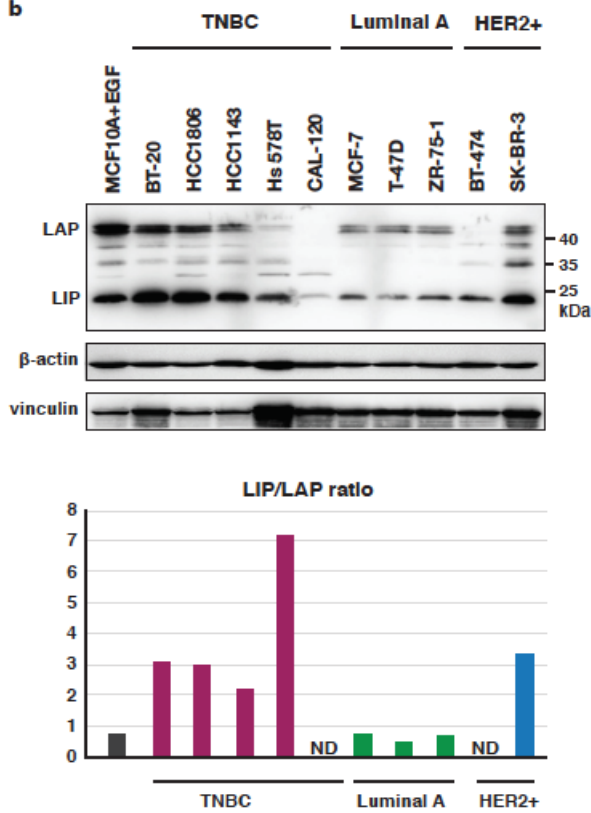

c

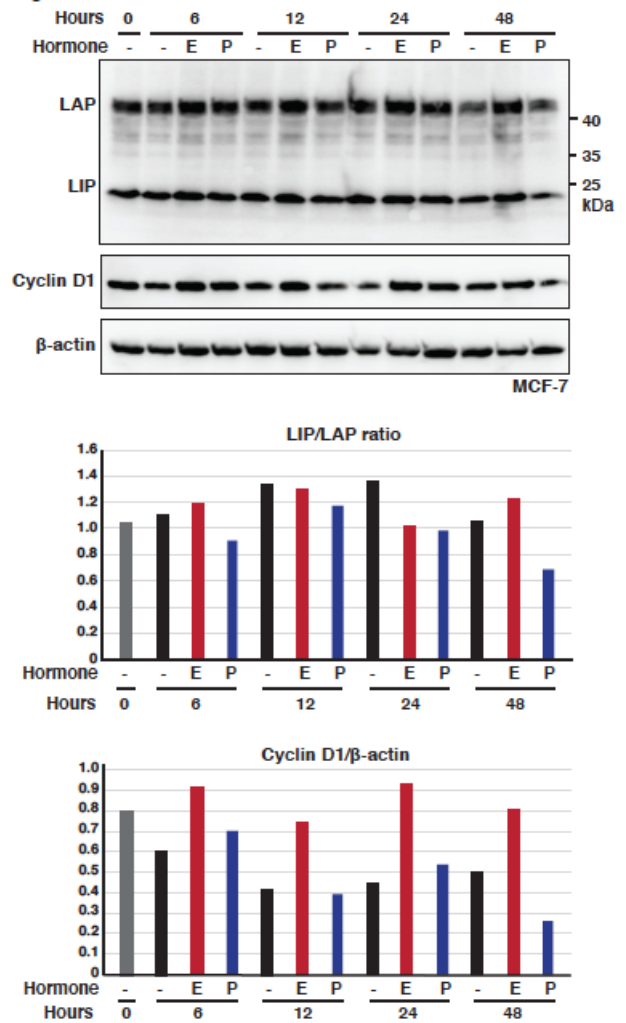

d

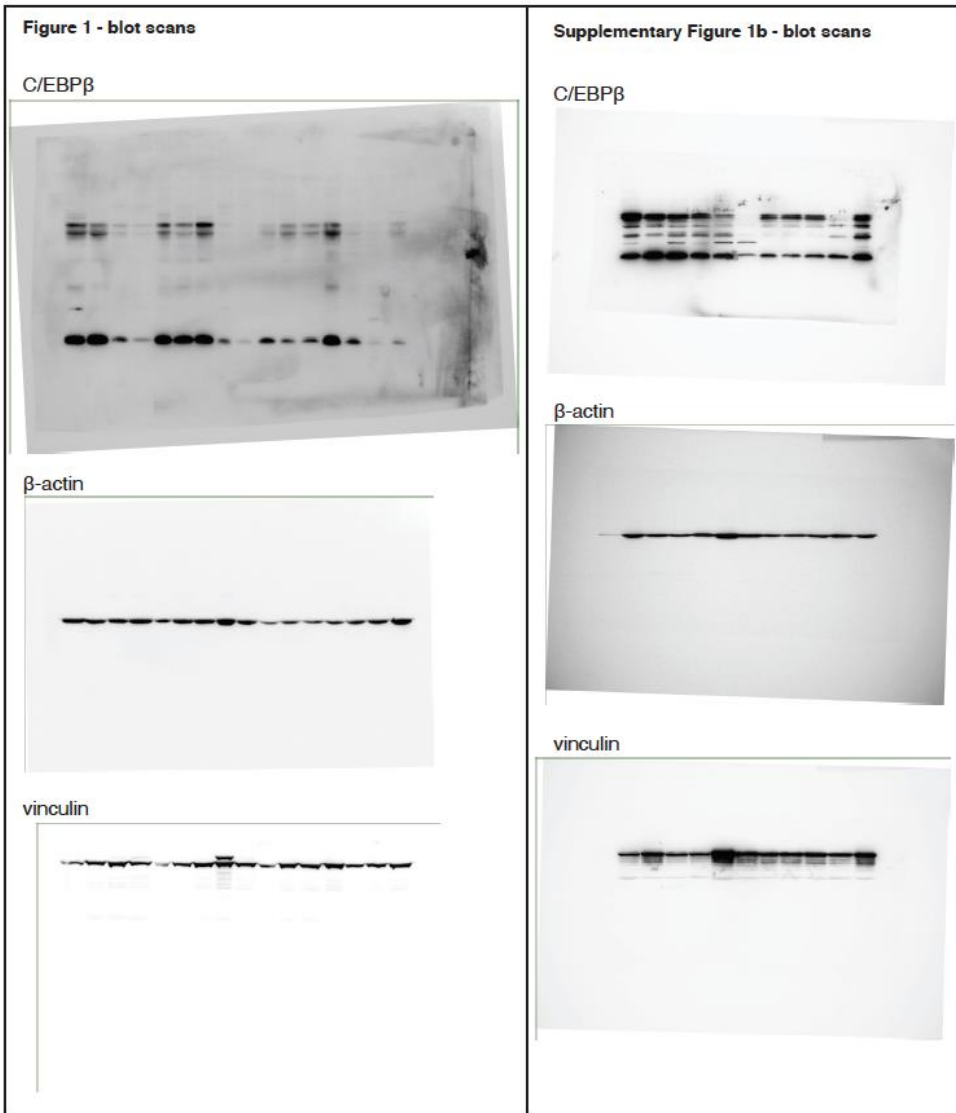

**Supplementary Figure 1.** (a) Schematic representation of the C/EBPβ protein isoform expression for wt CEBPB-mRNA or CEBPB-mRNA with mutated uORF (*CEBPB<sup>ΔuORF</sup>*)<sup>1</sup>. bZIP: basic leucine zipper DNA-binding domain; TA: transactivation domains. (b) The immunoblot shows the expression of LIP and LAP in a panel of TNBC (ER-, PR-, HER2-), luminal A (ER+, PR+/-, HER2-), HER2-positive (+) (ER-, PR-, HER2+), luminal B (-B) (ER+, PR+/-, HER2+) type breast cancer cell lines<sup>2</sup> and in untransformed MCF10A supplemented with EGF required for proliferation and known to induced LIP. The blots below show β-actin and vinculin as loading controls. The bar graph shows the relative LIP/LAP isoform ratio quantification per cell line of the blot shown. The LAP signal of CAL-120 and BT-474 were too low for reliable quantification. (c) Upper immunoblot shows the expression of LIP and LAP in MCF-7 cells treated with either progesterone (P) or estrogen (E) or solvent (-). Middle blot shows CyclinD1 expression known to be induced by ER, and the lower blot shows β-actin expression as loading control. The bar graph show quantifications of relative LIP/LAP expression ratios or CyclinD1 expression levels related to β-actin control, respectively. (d) Original immunoblot scans for Fig.1 and Supplementary Fig. 1b.

**Supplementary Figure 2**

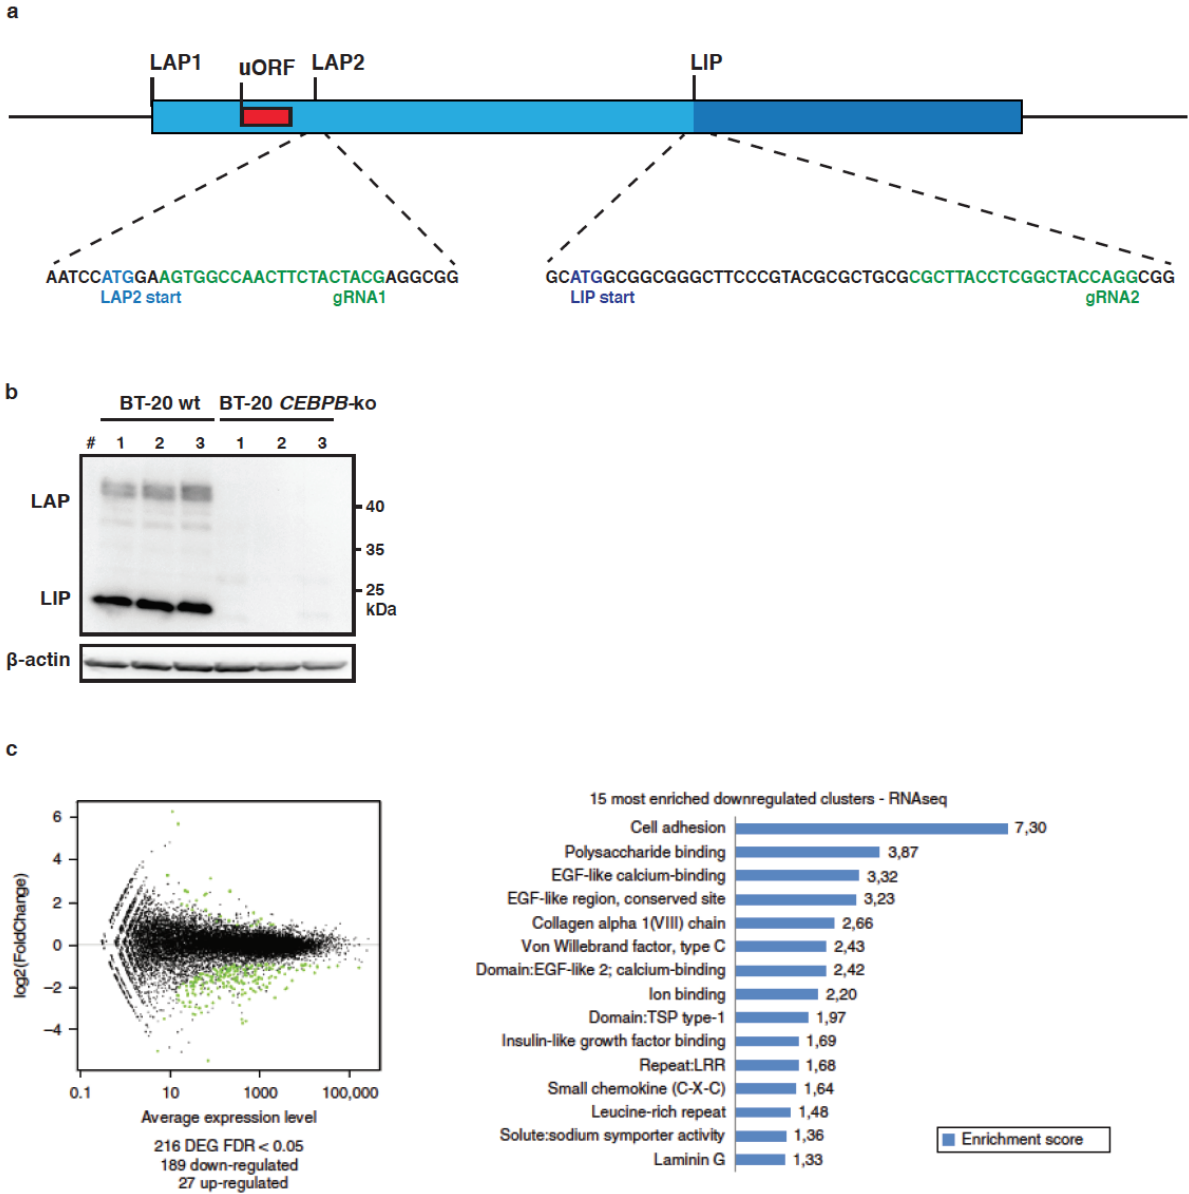

**Supplementary Figure 2.** (a) Schematic overview of the *CEBPB*-coding region and gRNAs used for CRISPR/Cas9 targeting for *CEBPB*-knockout. (b) Immunoblot for analysing LAP and LIP expression of three clones of BT-20 wt and BT-20 *CEBPB*-ko cells.  $\beta$ -actin was used as loading control. (c) Differential expressed genes (DEG) by ectopic expression of LIP in *Cebpb*-ko MEFs compared to empty vector control (EV) with an FDR < 0.05 and most enriched downregulated clusters (DAVID) (high stringency); data from Ackermann et al (2019) DOI:10.1038/s42003-019-0461-z.

**Supplementary Figure 3**

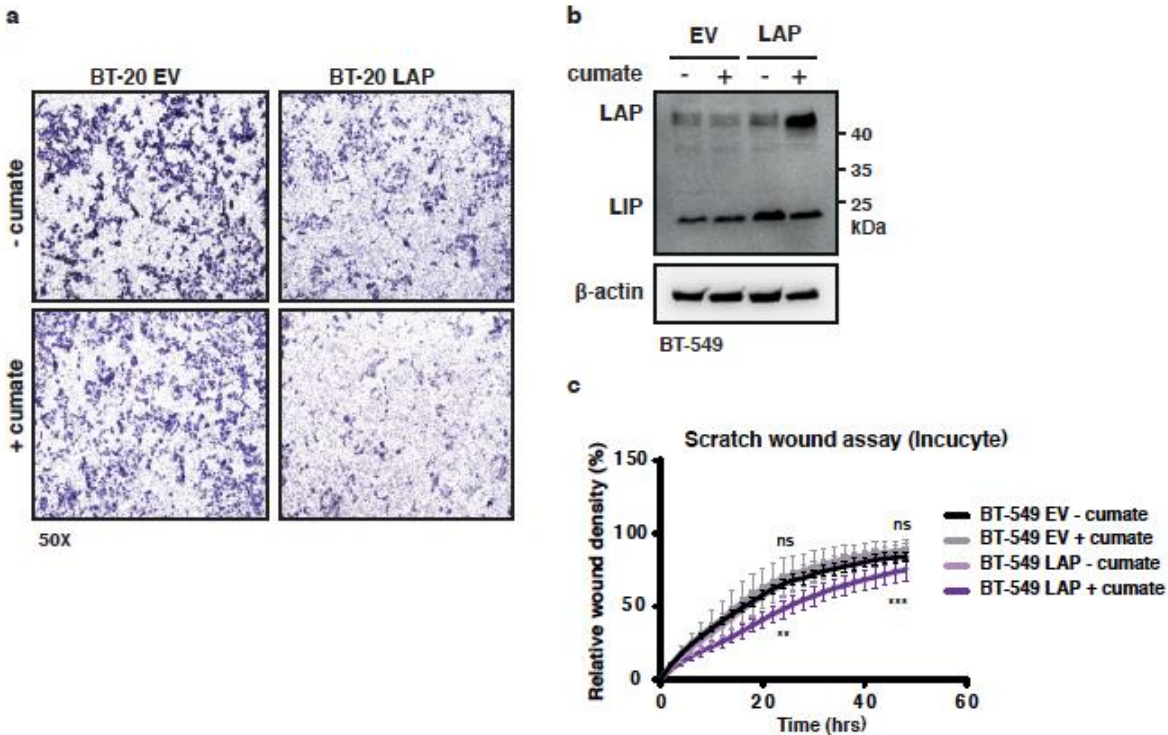

**Supplementary Figure 3.** (a) Representative images of Boyden chamber invasion assay of BT-20 cells containing cumate-inducible LAP expression construct or empty vector control (EV). (b) Immunoblot showing the expression of LAP and LIP in BT-549 cells containing a cumate-inducible LAP construct or empty vector control (EV).  $\beta$ -actin was used for loading control. (c) Time course of Incucyte scratch wound migration assay shown as relative wound density of BT-549 cells containing a cumate-inducible LAP construct or empty vector control induced with cumate (n=4). Statistical differences were analysed for timepoints 24 and 48 hrs using Two-way Anova analysis and Tukey's multiple comparisons test (BT-549 EV - cumate vs BT-549 EV + cumate were compared (ns), and BT-549 LAP - cumate vs BT-549 LAP + cumate were compared (\*\*)). Error bars represent SD, \* p<0.05, \*\* p<0.01, \*\*\* p<0.001

**Supplementary Figure 4**

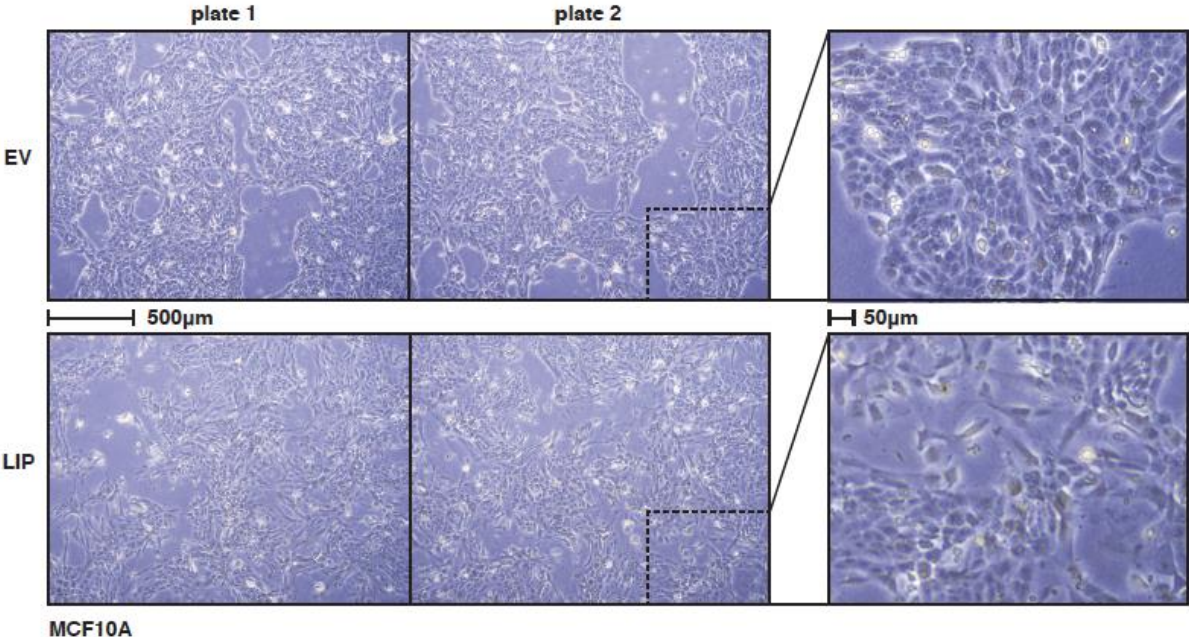

**Supplementary Figure 4.** Microscopic pictures of two cell culture plates with MCF10A cells transduced with either empty vector control (EV) or LIP expression vector (LIP). At the right a magnification of an area of plates 2 are shown.

**Supplementary Table 1.** C/EBP $\beta$ -associated fragments associated with H3K acetylation (H3K27Ac).

| Gene   | C/EBP $\beta$ site position | Cell line                  | Score (out of 1000) | Relative to TSS | Overlap H3K27ac |
|--------|-----------------------------|----------------------------|---------------------|-----------------|-----------------|
| FN1    | chr2:215417422-215417625    | HepG2                      | 296                 | 18442           | yes             |
| FN1    | chr2:215418620-215418878    | A549, HepG2, HepG2, IMR-90 | 940                 | 17189           | no              |
| FN1    | chr2:215420637-215420860    | HepG2                      | 192                 | 15207           | yes             |
| FN1    | chr2:215436368-215436640    | A549, HepG2, IMR-90, K562  | 1000                | -573            | yes             |
| FN1    | chr2:215451043-215451325    | A549, HepG2, IMR-90, K562  | 768                 | -15258          | no              |
| THBS1  | chr15:39579593-39579668     | IMR-90                     | 586                 | 1486            | yes             |
| THBS1  | chr15:39580651-39580906     | A549, IMR-90               | 916                 | 428             | yes             |
| THBS1  | chr15:39574580-39574844     | A549, IMR-90               | 285                 | 6499            | no              |
| TNC    | chr9:115132700-115132816    | IMR-90                     | 630                 | -14659          | yes             |
| TNC    | chr9:115134999-115135254    | IMR-90                     | 333                 | -17097          | yes             |
| TNC    | chr9:115135923-115136178    | IMR-90                     | 472                 | -18021          | yes             |
| TNC    | chr9:115106029-115106257    | A549, HepG2, IMR-90        | 1000                | 11900           | yes             |
| TNC    | chr9:115107288-115107543    | IMR-90                     | 302                 | 10614           | no              |
| TNC    | chr9:115115966-115116211    | A549, IMR-90               | 1000                | 1946            | yes             |
| MMP2   | chr16:55480463-55480741     | HepG2, IMR-90, K562        | 1000                | -1265           | yes             |
| MMP2   | chr16:55472618-55472742     | IMR-90                     | 599                 | 6580            | yes             |
| COL5A1 | chr9:134644738-134644964    | A549, IMR-90               | 1000                | -2935           | yes             |
| COL5A1 | chr9:134649201-134649456    | IMR-90                     | 291                 | -7398           | yes             |
| COL5A1 | chr9:134624062-134624317    | A549                       | 214                 | 17741           | yes             |
| COL5A1 | chr9:134624974-134625235    | IMR-90                     | 975                 | 16829           | yes             |
| COL5A1 | chr9:134626770-134627025    | IMR-90                     | 216                 | 15033           | No              |

Used: genome browser + ENCODE database (<https://genome.ucsc.edu>). Genome: Human GRCh38/hg38. Reported: binding sites of C/EBP $\beta$  20 kB up-and downstream of the Transcription Start Site (TSS)

## References

- 1 Müller, C. *et al.* Reduced expression of C/EBPbeta-LIP extends health and lifespan in mice. *Elife* **7**, doi:10.7554/eLife.34985 (2018).
- 2 Dai, X., Cheng, H., Bai, Z. & Li, J. Breast Cancer Cell Line Classification and Its Relevance with Breast Tumor Subtyping. *J Cancer* **8**, 3131-3141, doi:10.7150/jca.18457 (2017).
